# Supplementary material
Source: Research Square preprint supplement (doi:10.21203/rs.3.rs-9380767/v1)
Supplement: Supplementary file 1 [file d88285e4adfd11fda99f5e4b.docx]

Figure S1: The percentages of memory CD8+ T cell subsets.


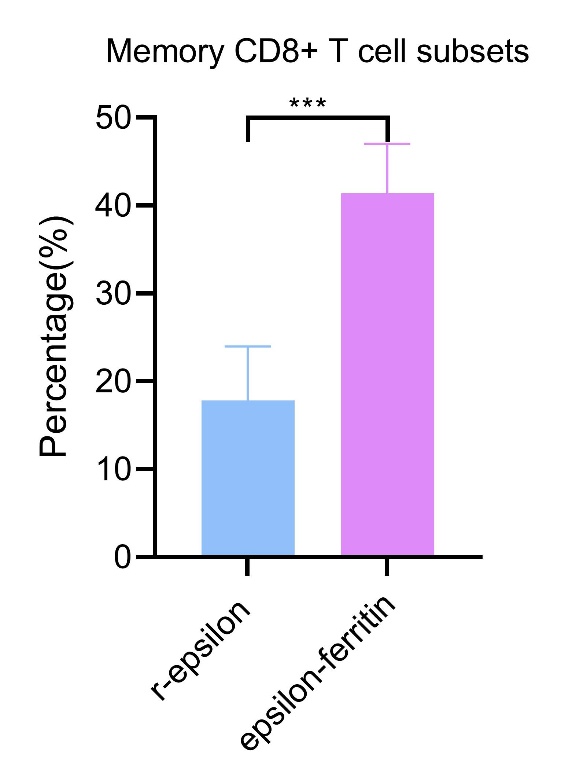


**Notes:** At weeks 15, spleen cells of mice from r-epsilon or epsilon-ferritin nanoparticles were taken and stained with antibodies. Flow analysis showed that memory CD8+ cells in the epsilon-ferritin nanoparticle group were significantly higher than those in the epsilon group(*p*<0.001).
